# Supplementary material for: Automated Polymer Purification Using Dialysis
Source: MDPI journal article supplement (doi:10.3390/polym12092095), 2020-09-15
Supplement: s1 [file s1]

# Automated Polymer Purification Using Dialysis

## Supplementary information

Timo Schuett <sup>1,2</sup>, Julian Kimmig <sup>1,2</sup>, Stefan Zechel <sup>1,2</sup> and Ulrich S. Schubert <sup>1,2,\*</sup>

<sup>1</sup> Laboratory of Organic and Macromolecular Chemistry (IOMC), Friedrich Schiller University Jena, Humboldtstr. 10, 07743 Jena, Germany; [timo.schuett@uni-jena.de](mailto:timo.schuett@uni-jena.de) (T.S.), [julian.kimmig@uni-jena.de](mailto:julian.kimmig@uni-jena.de) (J.K.), [stefan.zechel@uni-jena.de](mailto:stefan.zechel@uni-jena.de) (S.Z.)

<sup>2</sup> Jena Center of Soft Matter (JCSM), Friedrich Schiller University Jena, Philosophenweg 7, 07743 Jena, Germany

\* Correspondence: [ulrich.schubert@uni-jena.de](mailto:ulrich.schubert@uni-jena.de)

### NMR spectra

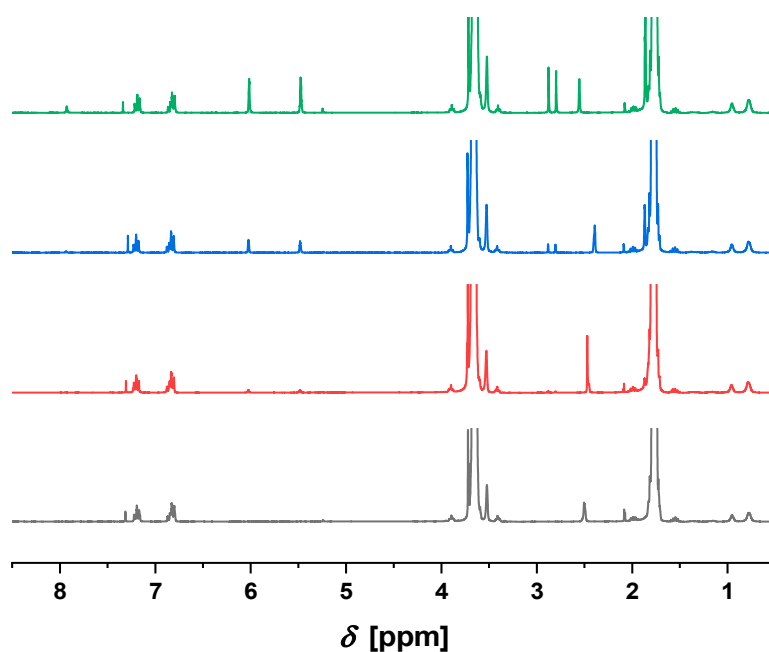

**Figure S1:** NMR kinetic ( $\text{CDCl}_3$ ) of the manual dialysis **M2** (green 0 h, blue 3 h, red 9 h, black 24 h).

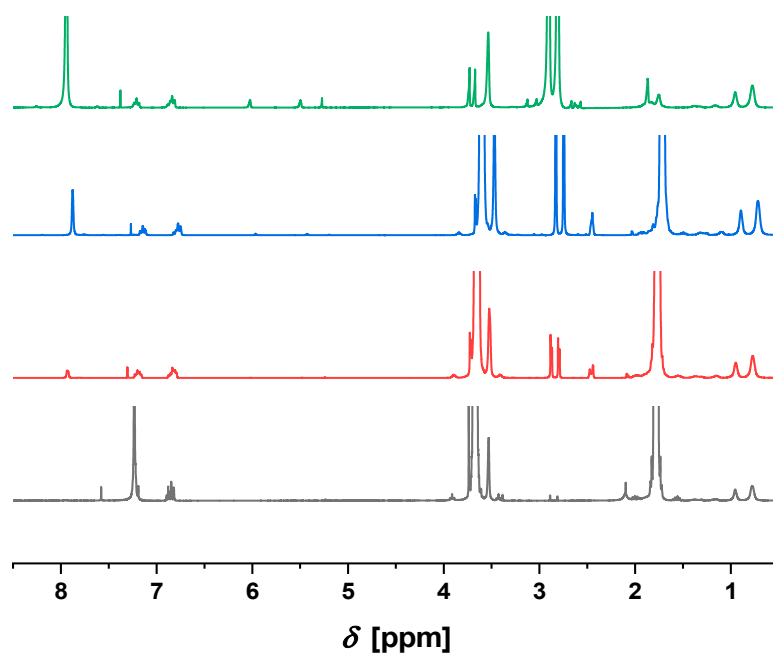

**Figure S2:** NMR kinetic (CDCl<sub>3</sub>) of the manual dialysis **M3** (green 0 h, blue 3 h, red 9 h, black 24 h).

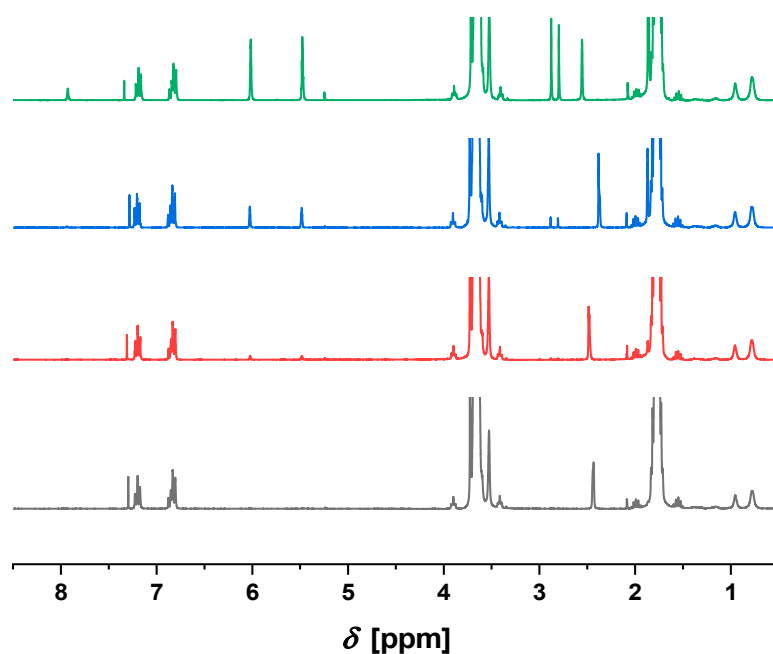

**Figure S3:** NMR kinetic (CDCl<sub>3</sub>) of the automated dialysis **A2** (modus 1) (green 0 h, blue 3 h, red 9 h, black 24 h).

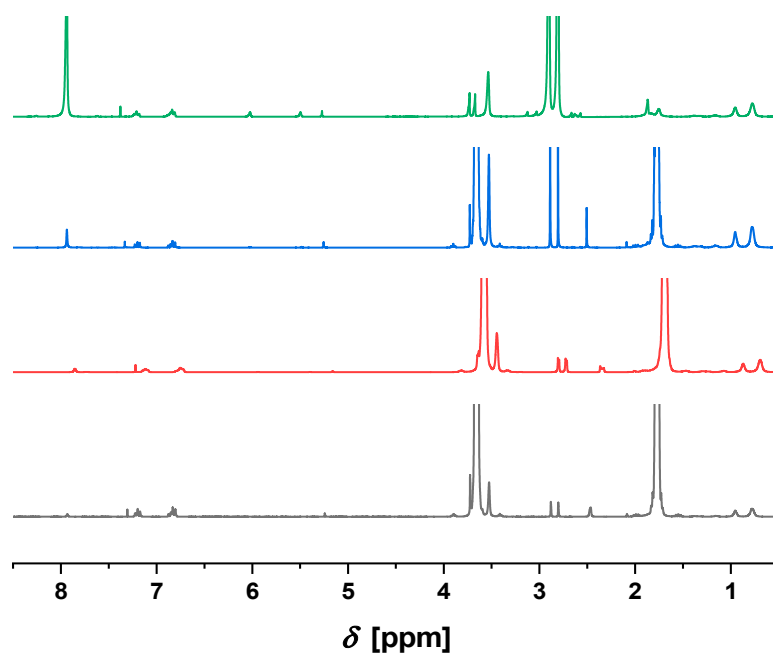

**Figure S4:** NMR kinetic (CDCl<sub>3</sub>) of the automated dialysis A3 (modus 1) (green 0 h, blue 3 h, red 9 h, black 24 h).

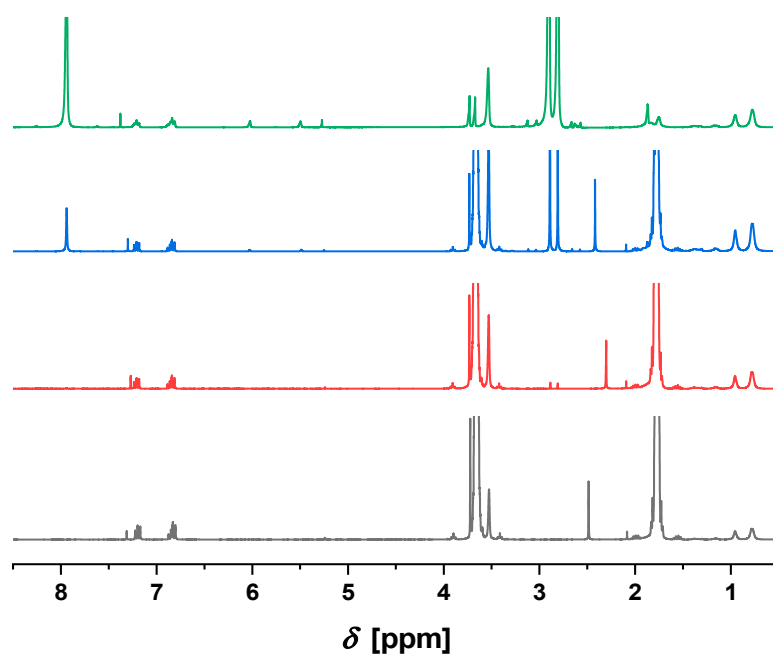

**Figure S5:** NMR kinetic (CDCl<sub>3</sub>) of the automated dialysis A4 (modus 2) (green 0 h, blue 3 h, red 9 h, black 24 h).

## SEC curves

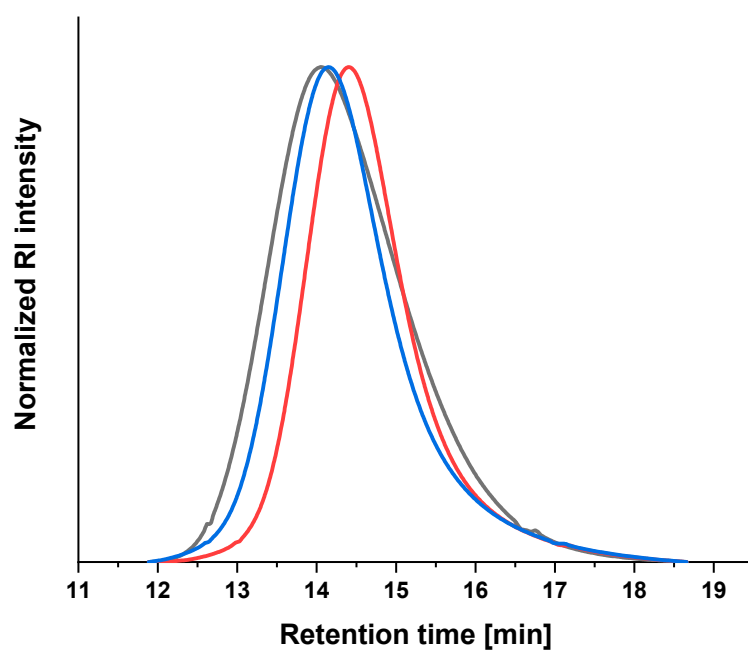

**Figure S6:** SEC curve of the polymer **P1** (blue), **P2** (red) and **P3** (black) (solvent: chloroform/isopropanol/triethyl-amine [94/2/4]).

**Table S1:** Details of the utilized standards for SEC-calibration. The listed molar masses ( $M_n$ ) are molar mass at the peak maximum. The supplier of the standards is PSS GmbH.

| Standard    | Stock solution | Molar mass ( $M_n$ ) of utilized standards |
|-------------|----------------|--------------------------------------------|
| Polystyrene | 1              | 1.040.000                                  |
|             |                | 128.000                                    |
|             |                | 18.100                                     |
|             |                | 1.620                                      |
|             | 2              | 659.000                                    |
|             |                | 67.500                                     |
|             |                | 9.130                                      |
|             |                | 685                                        |
|             | 3              | 246.000                                    |
|             |                | 32.500                                     |

|                           |   |         |
|---------------------------|---|---------|
| Poly(methyl methacrylate) |   | 3.420   |
|                           |   | 374     |
|                           | 1 | 981.000 |
|                           |   | 110.000 |
|                           |   | 10.100  |
|                           |   | 1.102   |
|                           | 2 | 520.000 |
|                           |   | 49.000  |
|                           |   | 4.250   |
|                           |   | 505     |
|                           | 3 | 217.000 |
|                           |   | 23.300  |
|                           |   | 2.000   |
|                           |   | 102     |

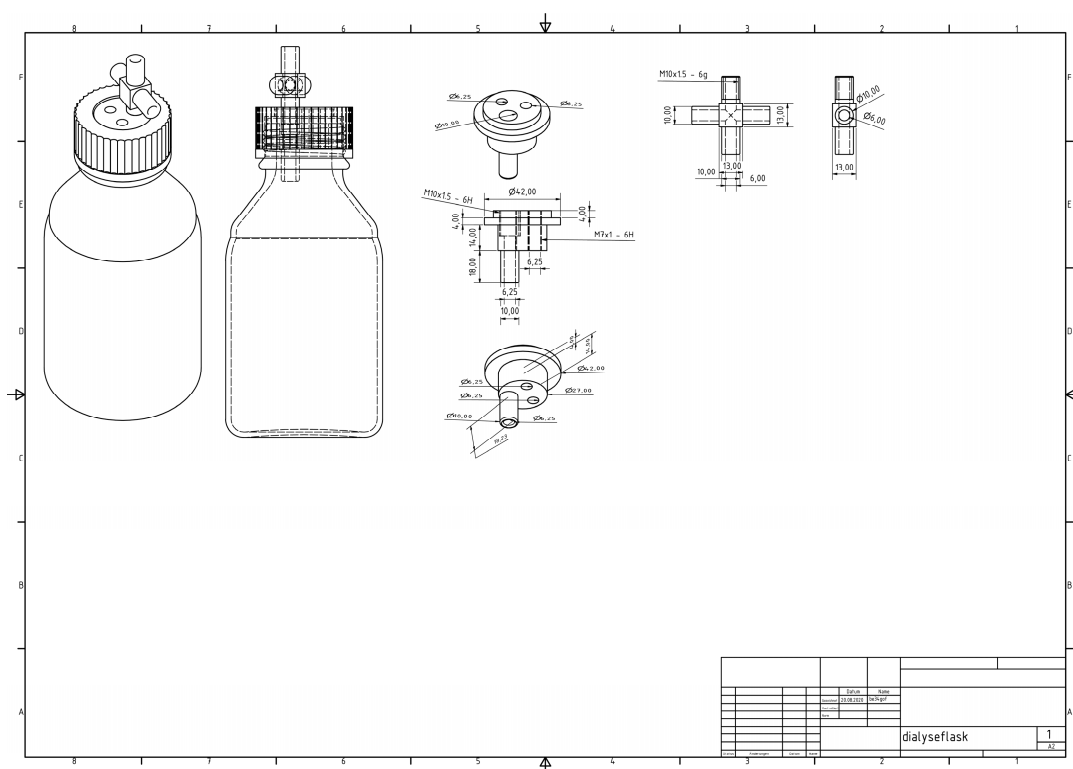

**Figure S7:** Schematic representation of the technical details of the dialysis apparatus.

## Pictures of automated dialysis equipment

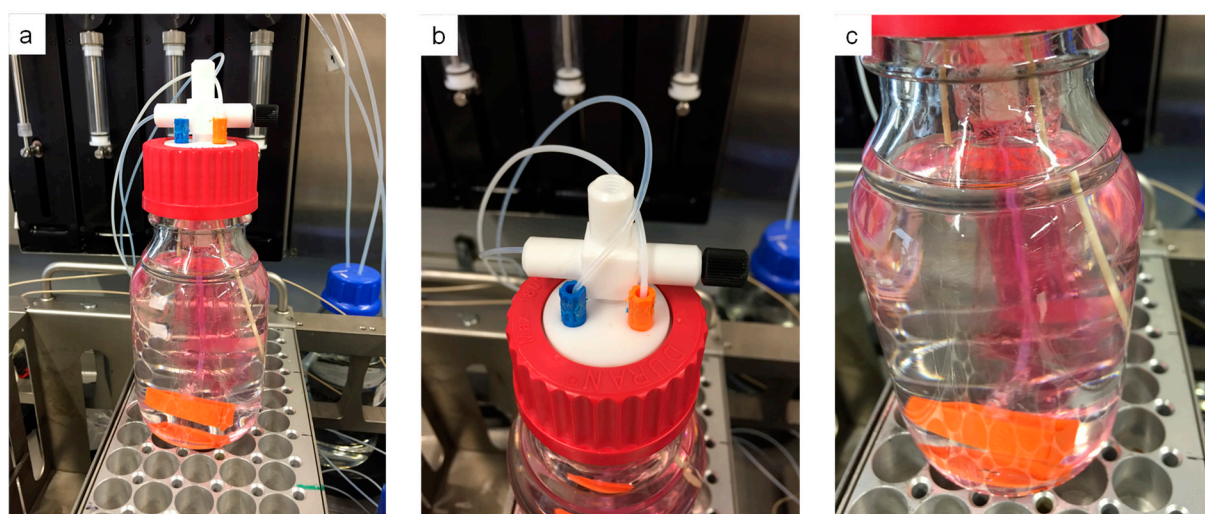

**Figure S8:** Automated dialysis equipment without pump (a: picture of the complete device; b: zoom in the injection port; c: zoom in the dialysis tube).

## Pictures of dialysis M1

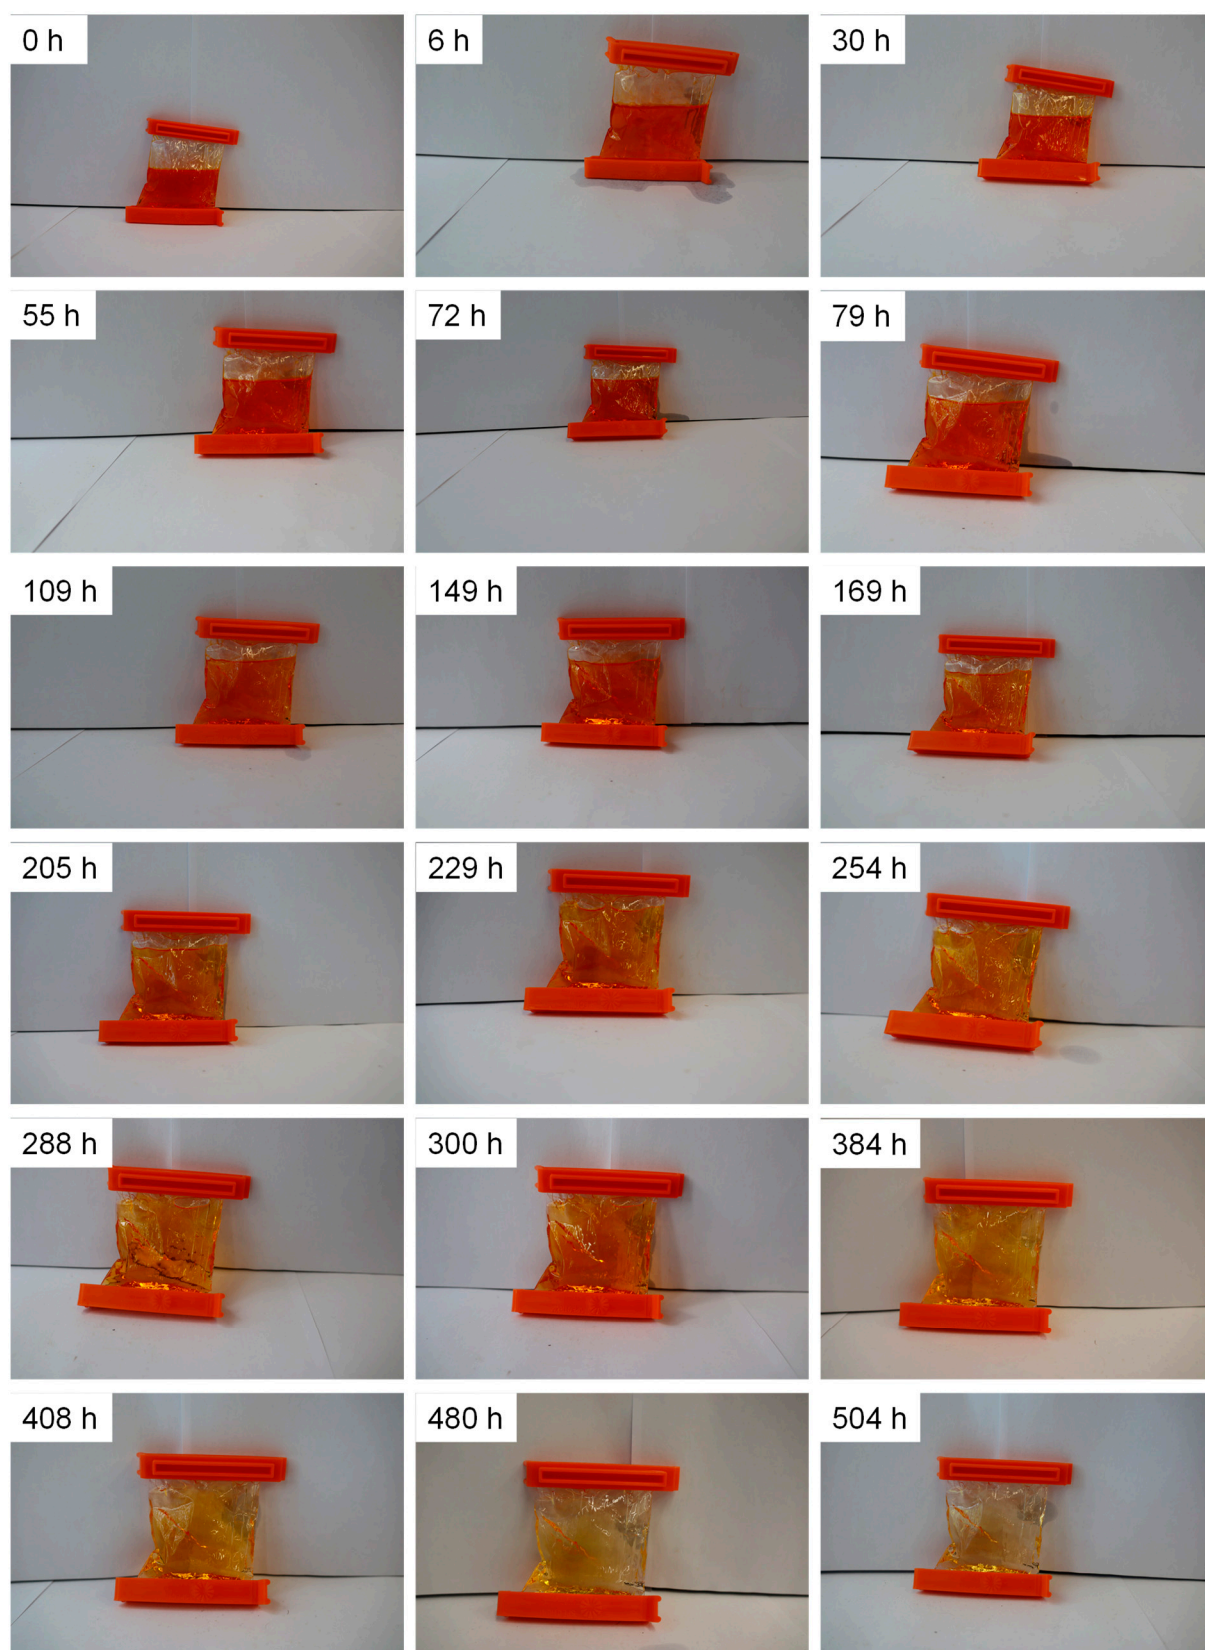

**Figure S9:** Overview of the manual dialysis using Sudan I as dye for the visualization. The solvent was changed every 12 h (400 mL each).



## Pictures of dialysis A1

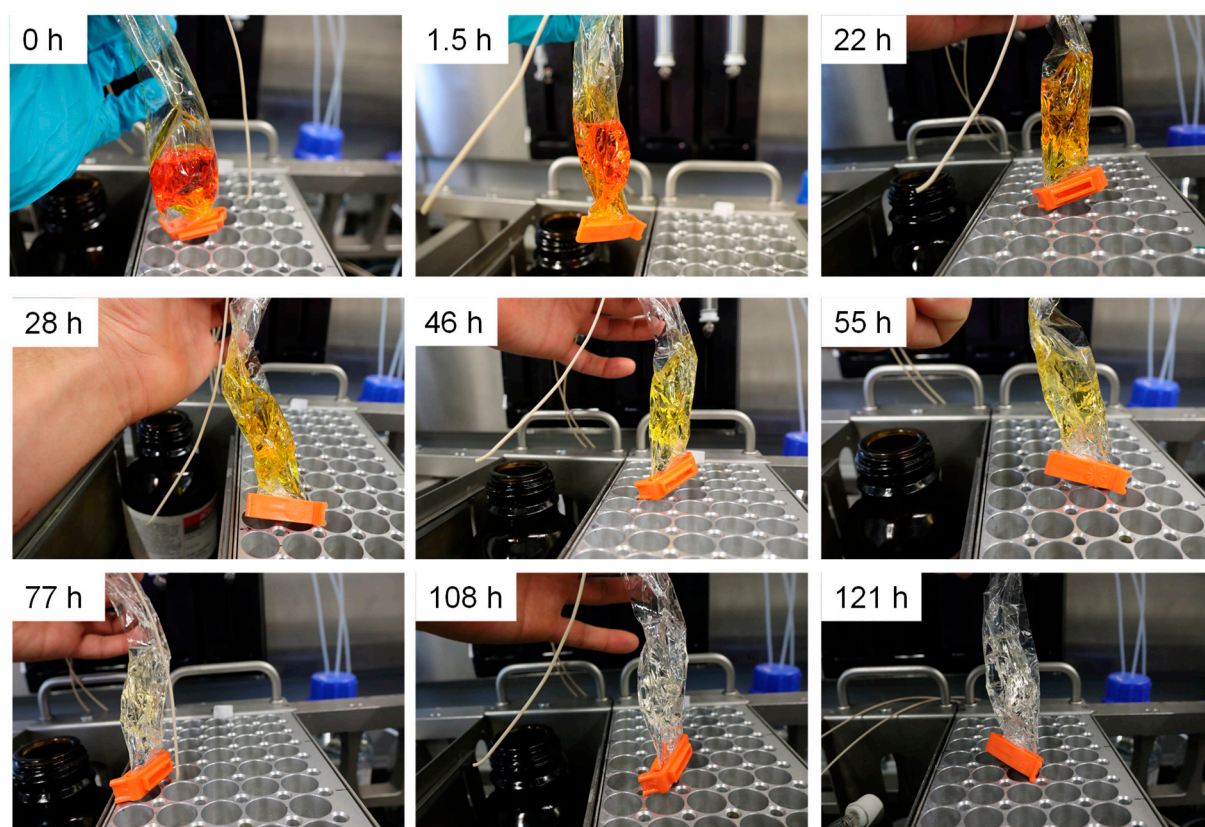

**Figure S10:** Overview of the automated dialysis using Sudan I as dye for the visualization. The solvent was changed continuously (35 mL/h).
